# Supplementary material
Source: publisher figshare collection journal article supplement (https://karger.figshare.com/ndownloader/files/21974325)
Supplement: Supplementary file 1 [file 21974325]

S2 Aortic valve weight, stenosis severity, annular and LVOT size and outcomes by valve type

|  | Bicuspid AO (N=102) | | Tricuspid AO (N=944) | |  |
| --- | --- | --- | --- | --- | --- |
|  | *N/Mean* | *%/STD* | *N/Mean* | *%/STD* | *p-value* |
| Valve Weight (g) | 3.23 | 1.8 | 2.44 | 0.98 | <0.001 |
| AV weight index (g/m2) | 1.63 | 0.87 | 1.28 | 0.5 | <0.001 |
| AVW/AV annular area (g/cm2) | 0.59 | 0.24 | 0.53 | 0.2 | 0.013 |
| Severe AS (%) | 83 | 81.4 | 794 | 81.1 | 0.48 |
| Moderate AS (%) | 16 | 16.7 | 123 | 13.4 | 0.45 |
| LVOT Diameter (cm) | 2.23 | 0.23 | 2.13 | 0.64 | 0.006 |
| Aortic annulus area (cm2) | 5.45 | 1.78 | 4.76 | 1.31 | <0.001 |
| Ascending aorta area (cm2) | 11.77 | 3.32 | 8.855 | 2.469 | <0.001 |
| CABG (any) | 10 | 9.8 | 262 | 27.8 | <0.001 |
| CABG (pre-AVR) | 7 | 6.9 | 155 | 16.4 | 0.011 |
| All-cause death | 9 | 8.8 | 235 | 24.9 | <0.001 |
